# Supplementary material
Source: PubMed Central journal article supplement (PMC8901044)
Supplement: ehp9745.s001.acco.pdf [file ehp9745.s001.acco.pdf]

**Note to readers with disabilities:** *EHP* strives to ensure that all journal content is accessible to all readers. However, some figures and Supplemental Material published in *EHP* articles may not conform to [508 standards](#) due to the complexity of the information being presented. If you need assistance accessing journal content, please contact [ehp508@niehs.nih.gov](mailto:ehp508@niehs.nih.gov). Our staff will work with you to assess and meet your accessibility needs within 3 working days.

### **Supplemental Material**

#### **Associations between the Maternal Exposome and Metabolome during Pregnancy**

Minjian Chen, Yusheng Guan, Rui Huang, Jiawei Duan, Jingjing Zhou, Ting Chen, Xinru Wang, Yankai Xia, and Stephanie J. London

#### **Table of Contents**

**Table S1.** Demographic information of pregnant women without inclusion in Jiangsu province from April 2013 to July 2016 (n=508).

**Table S2.** Element concentrations in urine samples in the first trimester (ng/mL) from 963 women in Jiangsu province, China from April 2013 to July 2016.

**Figure S1.** Flow diagram of the participant inclusion process.

**Figure S2.** The models for integration of the literature search with our results for use in explaining the pathway: exposome-metabolome-outcome. (A) Positive associations between maternal exposure to exogenous chemicals and outcome from literature, between maternal metabolite and outcome from literature, and between maternal exposure to exogenous chemicals and metabolite identified in our study. In this scenario, a previous study reported that exogenous chemical exposure is positively related to health outcomes, and our study found that exogenous chemical exposure might increase one metabolite reported to be positively related to health outcomes in a previous study. (B) Negative associations between maternal exposure to exogenous chemicals and outcome from literature, and between maternal metabolite and outcome from literature; positive association between maternal exposure to exogenous chemicals and metabolite identified in our study. In this scenario, a previous study reported that exogenous chemical exposure is negatively related to health outcomes, and our study found that exogenous chemical exposure might increase one metabolite reported to be negatively related to health outcomes in a previous study. (C) Negative associations between maternal exposure to exogenous chemicals and outcome from literature, and between maternal exposure to exogenous chemicals and metabolite identified in our study; positive association between maternal metabolite and outcome from literature. In this scenario, a previous study reported that exogenous chemical exposure is negatively related to health outcomes, and our study found that exogenous chemical exposure might decrease one metabolite reported to be positively related to health outcomes in a previous study. (D) Positive association between maternal exposure to exogenous chemicals and outcome from literature; negative associations between maternal metabolite and outcome from literature, between maternal exposure to exogenous chemicals and metabolite identified in our study. In this scenario, a previous study reported that exogenous chemical exposure is positively related to health outcomes, and our study found that exogenous chemical exposure might decrease one metabolite reported to be negatively related to health outcomes in a previous study.

**Figure S3.** Heatmap of Bonferroni-14,734 corrected  $p$  value regarding associations between exposome and metabolome in urine from pregnant women in Jiangsu province from April 2013 to July 2016. When the association was in the positive direction, the blue scale was used for visualizing  $-\log_{10}(p)$  value. When the association was in the negative direction, the red scale was used for visualizing  $-\log_{10}(p)$  value. The association was adjusted by maternal age, BMI before pregnancy, parity, and education using polytomous logistic regression with Bonferroni correction. “\*” indicates Bonferroni corrected  $p$  value < 0.05. The sample size for the association analysis between organic exposome and metabolome was 1,024; the sample size for the association analysis between inorganic exposome and metabolome was 963. The data underlying this figure can be found in **Excel Table S2**.

**Figure S4.** Network of environmentally determined urinary metabotypes of pregnant women in Jiangsu province from April 2013 to July 2016 in the KEGG general metabolic pathway map. The figure was built by ipath (<https://pathways.embl.de/>). The sample size for the environmentally determined urinary metabotypes according to the organic exposome was 1,024; the sample size for the environmentally determined urinary metabotypes according to the inorganic exposome was 963. The pie chart named “original proportion” shows the original constituent ratios of numbers of profiled chemicals in the exposome classified into macro and trace essential element, potential toxic and other element, organic pollutant, and plant metabolite and phytoestrogen. The pie charts in the pathway were built based on constituent ratios of numbers of chemicals in the exposome that were significantly associated with this metabolite classified into macro and trace essential element, potential toxic and other element, organic pollutant, and plant metabolite and phytoestrogen, and the size of pie charts reflects by the number of chemicals in the exposome that were significantly associated with this metabolite. Other profiled metabolites without significant association with any exposome chemical in our study were colored purple in the pathway map. Metabolites not included in the general metabolic pathway map are not shown. The original general metabolic pathway map is available at <https://pathways.embl.de/ipath3.cgi>. KEGG, Kyoto Encyclopedia of Genes and Genomes. The data underlying this figure can be found in **Figure S3** and **Excel Table S2**.

**Excel Table S1.** List of the exposome and metabolome metabolites and their classifications.

**Excel Table S2.** Statistical analysis results of associations between exposome and urinary metabolome among pregnant women in Jiangsu province, China from April 2013 to July 2016 (n=1,024 for organic exposome and metabolome; n=963 for inorganic exposome and metabolome).

**Excel Table S3.** Information on the associations between exposome and outcomes during pregnancy mediated by environmentally determined urinary metabotypes.

## References

**Additional File-** Excel Document

**Table S1.** Demographic information of pregnant women without inclusion in Jiangsu province from April 2013 to July 2016 (n=508).

| Maternal characteristic <sup>a</sup> .                   |                 |
|----------------------------------------------------------|-----------------|
| Maternal age (year, mean $\pm$ SD)                       | 28.8 $\pm$ 3.7  |
| Ethnicity [Number (%)]                                   |                 |
| Han                                                      | 498(98.0%)      |
| Other                                                    | 10(2.0%)        |
| Maternal height (cm, mean $\pm$ SD)                      | 162.1 $\pm$ 4.9 |
| Weight before pregnancy (kg, mean $\pm$ SD)              | 55.2 $\pm$ 8.2  |
| BMI before pregnancy (kg/m <sup>2</sup> , mean $\pm$ SD) | 21.0 $\pm$ 2.8  |
| Parity [No.(%)]                                          |                 |
| 0                                                        | 413(81.3%)      |
| $\geq$ 1                                                 | 95(18.7%)       |
| Education (years) [No.(%)]                               |                 |
| $\leq$ 12                                                | 190(37.4%)      |
| $\geq$ 13                                                | 318(62.6%)      |
| Smoking [No.(%)] <sup>b</sup>                            |                 |
| Yes                                                      | 8(1.6%)         |
| No                                                       | 500(98.4%)      |
| Alcohol consumption [No.(%)] <sup>b</sup>                |                 |
| Yes                                                      | 19(3.7%)        |
| No                                                       | 489(96.3%)      |

Note: <sup>a</sup>These data were complete for all participants.

<sup>b</sup>reported “Yes” at least one time in the first, second or third trimester.

**Table S2.** Element concentrations in urine samples in the first trimester (ng/mL) from 963 women in Jiangsu province, China from April 2013 to July 2016.

| Element                 | Detectable rate(%) | Limit of detection | Geometric Mean | Percentile |          |          |          |          |
|-------------------------|--------------------|--------------------|----------------|------------|----------|----------|----------|----------|
|                         |                    |                    |                | Min        | 25       | 50       | 75       | 90       |
| Magnesium               | 100                | 0.038              | 35.477         | 1.923      | 19.219   | 42.121   | 70.418   | 110.444  |
| Calcium                 | 89.1               | 3.954              | 79.343         | <LOD       | 47.885   | 128.598  | 233.509  | 370.413  |
| Boron                   | 99.69              | 2.115              | 1358.191       | <LOD       | 897.382  | 1476.694 | 2356.717 | 3251.343 |
| Vanadium                | 64.69              | 0.028              | 0.095          | <LOD       | <LOD     | 0.128    | 0.396    | 0.724    |
| Chromium                | 48.81              | 0.39               | 0.659          | <LOD       | <LOD     | <LOD     | 1.991    | 4.839    |
| Manganese <sup>a</sup>  | 57.94              | 0.885              | 2.563          | <LOD       | <LOD     | 7.569    | 8.5      | 10.704   |
| Iron                    | 58.26              | 18.839             | 49.903         | <LOD       | <LOD     | 91.101   | 160.964  | 240.678  |
| Cobalt <sup>b</sup>     | 92                 | 0.007              | 0.307          | <LOD       | 0.192    | 0.402    | 0.807    | 1.556    |
| Nickel                  | 54.21              | 0.681              | 2.823          | <LOD       | <LOD     | 12.827   | 15.228   | 19.304   |
| Copper                  | 87.33              | 0.744              | 14.274         | <LOD       | 15.67    | 21.215   | 30.036   | 40.405   |
| Zinc                    | 72.9               | 44.3               | 283.368        | <LOD       | <LOD     | 558.221  | 812.256  | 1169.406 |
| Selenium                | 95.53              | 0.231              | 4.392          | <LOD       | 2.663    | 5.529    | 9.756    | 15.164   |
| Molybdenum <sup>b</sup> | 100                | 0.01               | 29.622         | 0.475      | 19.258   | 32.515   | 48.391   | 70.199   |
| Arsenic <sup>a</sup>    | 100                | 0.04               | 24.040         | 5.429      | 15.491   | 23.078   | 34.944   | 55.659   |
| Cadmium <sup>b</sup>    | 48.29              | 0.075              | 0.153          | <LOD       | <LOD     | <LOD     | 0.596    | 1.844    |
| Mercury                 | 83.39              | 0.014              | 1.508          | <LOD       | 1.827    | 3.131    | 5.352    | 11.459   |
| Lead <sup>d</sup>       | 63.55              | 1.39               | 3.304          | <LOD       | <LOD     | 4.877    | 7.471    | 14.366   |
| Lithium                 | 80.69              | 0.323              | 0.538          | <LOD       | 0.376    | 0.583    | 0.9      | 1.253    |
| Beryllium               | 78.19              | 0.016              | 0.610          | <LOD       | 1.579    | 2.038    | 2.038    | 2.619    |
| Aluminum                | 58.36              | 35.035             | 63.635         | <LOD       | <LOD     | 118.184  | 146.587  | 204.376  |
| Titanium                | 99.38              | 2.239              | 97.436         | <LOD       | 59.645   | 111.151  | 175.716  | 269.97   |
| Gallium                 | 48.81              | 0.025              | 0.050          | <LOD       | <LOD     | <LOD     | 0.204    | 0.591    |
| Germanium               | 67.6               | 0.132              | 0.249          | <LOD       | <LOD     | 0.317    | 0.544    | 0.805    |
| Rubidium                | 100                | 0.075              | 1812.053       | 82.691     | 1228.024 | 1966.355 | 3005.827 | 3963.881 |
| Strontium <sup>a</sup>  | 99.58              | 1.781              | 124.408        | <LOD       | 70.026   | 136.968  | 230.393  | 342.785  |
| Zirconium               | 53.17              | 0.054              | 0.162          | <LOD       | <LOD     | 0.563    | 0.725    | 0.915    |
| Rhodium                 | 74.04              | 0.001              | 0.010          | <LOD       | <LOD     | 0.029    | 0.03     | 0.031    |
| Palladium               | 50.16              | 0.86               | 1.077          | <LOD       | <LOD     | 1.791    | 2.627    | 3.054    |
| Tin <sup>b</sup>        | 69.47              | 0.081              | 0.370          | <LOD       | <LOD     | 0.607    | 1.01     | 2.116    |
| Antimony <sup>c</sup>   | 29.8               | 0.014              | 0.013          | <LOD       | <LOD     | <LOD     | 0.022    | 0.081    |
| Cesium <sup>a</sup>     | 100                | 0.009              | 12.025         | 1.363      | 8.171    | 12.634   | 18.186   | 25.329   |
| Barium <sup>a</sup>     | 87.12              | 1.091              | 18.702         | <LOD       | 14.242   | 23.517   | 45.499   | 82.118   |
| Lanthanum               | 68.85              | 0.015              | 0.083          | <LOD       | <LOD     | 0.139    | 0.275    | 0.583    |
| Cerium                  | 42.68              | 0.024              | 0.103          | <LOD       | <LOD     | <LOD     | 1.351    | 7.204    |
| Samarium                | 65.32              | 0.009              | 0.021          | <LOD       | <LOD     | 0.027    | 0.046    | 0.094    |
| Dysprosium              | 64.38              | 0.003              | 0.014          | <LOD       | <LOD     | 0.034    | 0.045    | 0.074    |
| Holmium                 | 60.96              | 0.001              | 0.009          | <LOD       | <LOD     | 0.038    | 0.045    | 0.07     |
| Erbium                  | 20.77              | 0.004              | 0.004          | <LOD       | <LOD     | <LOD     | <LOD     | 0.164    |
| Thulium                 | 30.53              | 0.001              | 0.002          | <LOD       | <LOD     | <LOD     | 0.008    | 0.079    |

|                       |       |        |       |      |       |       |        |        |
|-----------------------|-------|--------|-------|------|-------|-------|--------|--------|
| Ytterbium             | 58.57 | 0.005  | 0.022 | <LOD | <LOD  | 0.04  | 0.108  | 0.299  |
| Lutetium              | 46.21 | 3.628  | 5.044 | <LOD | <LOD  | <LOD  | 16.066 | 16.511 |
| Hafnium               | 54.41 | 0.002  | 0.012 | <LOD | <LOD  | 0.051 | 0.093  | 0.231  |
| Tantalum              | 52.44 | 0.0003 | 0.002 | <LOD | <LOD  | 0.006 | 0.019  | 0.042  |
| Gold                  | 69.89 | 0.006  | 0.213 | <LOD | <LOD  | 1.248 | 1.329  | 1.501  |
| Thallium <sup>a</sup> | 99.17 | 0.002  | 0.313 | <LOD | 0.212 | 0.354 | 0.551  | 0.826  |
| Thorium               | 55.24 | 0.006  | 0.028 | <LOD | <LOD  | 0.032 | 0.19   | 0.501  |
| Uranium <sup>a</sup>  | 75.08 | 0.002  | 0.018 | <LOD | 0.002 | 0.027 | 0.066  | 0.174  |

Note: LOD, limit of detection.

The value < LOD was imputed with the value of LOD/2 for calculation. The unit for magnesium and calcium in this table is mg/L.

<sup>a</sup>The geometric mean in our study was above the 95% confidence intervals (CIs) of corresponding element in female nonsmokers reported in US CDC Fourth National Report on Human Exposure to Environmental Chemicals, Updated Tables, January 2019, Volume Two (US National Exposure Report). Urinary geometric mean and its CIs (ng/mL) was reported as 0.122 (0.109-0.137) in 2011-2012, not available in 2013-2014, not available in 2015-2016 for manganese; 6.75 (5.79-7.87) in 2011-2012, 6.06 (5.07-7.24) in 2013-2014, 5.85 (5.19-6.59) in 2015-2016 for arsenic; 0.321 (0.288-0.359) in 2011-2012, 0.237 (0.219-0.257) in 2013-2014, 0.260 (0.229-0.296) in 2015-2016 for lead; 74.9 (69.1-81.3) in 2011-2012, 72.7 (67.9-77.9) in 2013-2014, 77.5 (70.3-85.5) in 2015-2016 for strontium; 3.48 (3.22-3.75) in 2011-2012, 3.60 (3.37-3.84) in 2013-2014, 3.63 (3.27-4.03) in 2015-2016 for cesium; 1.04 (0.928-1.17) in 2011-2012, 0.921 (0.838-1.01) in 2013-2014, 0.963 (0.887-1.05) in 2015-2016 for barium; 0.132 (0.121-0.143) in 2011-2012, 0.130 (0.121-0.139) 2013-2014, 0.139 (0.126-0.153) in 2015-2016 for thallium; 0.005 (0.005-0.006) in 2011-2012, 0.005 (0.004-0.006) in 2013-2014, 0.005 (0.004-0.006) in 2015-2016 for uranium.

<sup>b</sup>The geometric mean in our study was within the 95% CIs of corresponding urinary element reported in US National Exposure Report. Urinary geometric mean and its CIs (ng/mL) was reported as 0.313 (0.282-0.348) in 2011-2012, 0.374 (0.342-0.410) in 2013-2014, 0.401 (0.370-0.435) in 2015-2016 for cobalt; 30.2 (27.1-33.6) in 2011-2012, 27.6 (25.1-30.4) in 2013-2014, 29.0 (25.5-33.1) in 2015-2016 for molybdenum; 0.181 (0.160-0.205) in 2011-2012, 0.139 (0.126-0.155) in 2013-2014, 0.161 (0.138-0.189) in 2015-2016 for cadmium; 0.574 (0.506-0.651) in 2011-2012, 0.405 (0.342-0.481) in 2013-2014, 0.467 (0.405-0.539) in 2015-2016 for tin.

<sup>c</sup>The geometric mean in our study was below the 95% CIs of corresponding urinary element reported in US National Exposure Report. Urinary geometric mean and its CIs (ng/mL) was reported as not available in 2011-2012, 0.036 (0.032-0.040) in 2013-2014, 0.038 (0.036-0.041) in 2015-2016 for antimony.

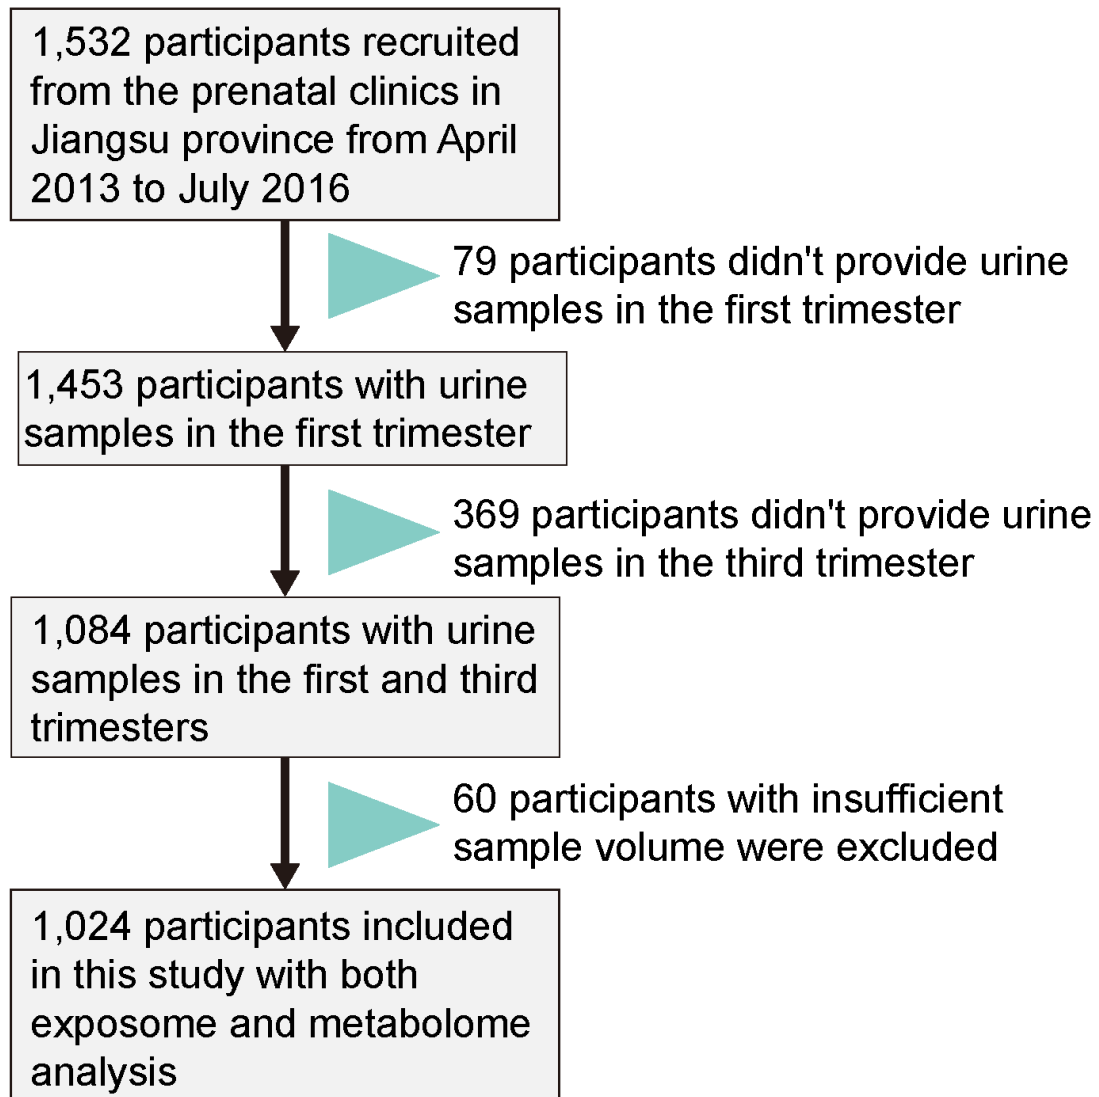

**Figure S1.** Flow diagram of the participant inclusion process.

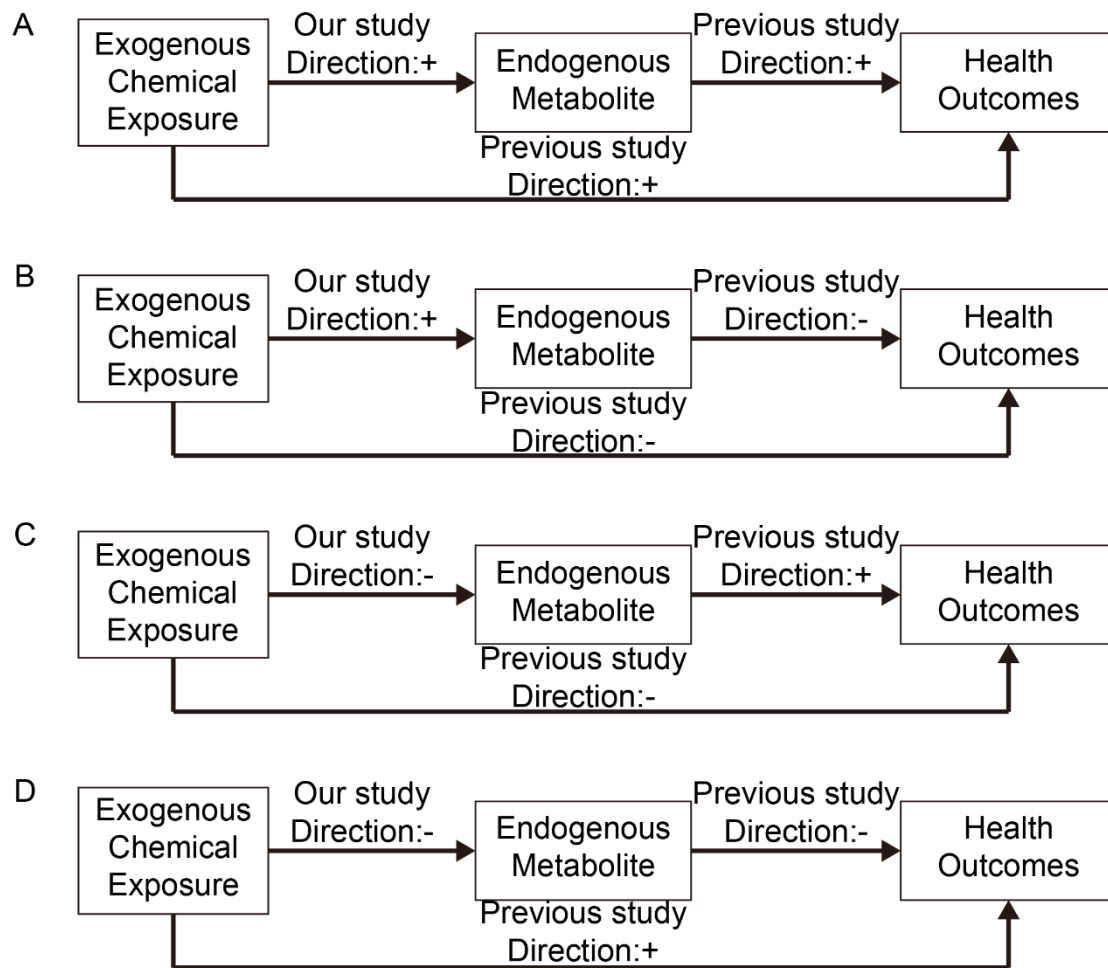

**Figure S2.** The models for integration of the literature search with our results for use in explaining the pathway: exposome-metabolome-outcome. (A) Positive associations between maternal exposure to exogenous chemicals and outcome from literature, between maternal metabolite and outcome from literature, and between maternal exposure to exogenous chemicals and metabolite identified in our study. In this scenario, a previous study reported that exogenous chemical exposure is positively related to health outcomes, and our study found that exogenous chemical exposure might increase one metabolite reported to be positively related to health outcomes in a previous study. (B) Negative associations between maternal exposure to exogenous chemicals and outcome from literature, and between maternal metabolite and outcome from literature; positive association between maternal exposure to exogenous chemicals and metabolite identified in our study. In this scenario, a previous study reported that exogenous chemical exposure is negatively related to health outcomes, and our study found that exogenous chemical exposure might increase one metabolite reported to be negatively related to health outcomes in a previous study. (C) Negative associations between maternal exposure to exogenous chemicals and outcome from



literature, and between maternal exposure to exogenous chemicals and metabolite identified in our study; positive association between maternal metabolite and outcome from literature. In this scenario, a previous study reported that exogenous chemical exposure is negatively related to health outcomes, and our study found that exogenous chemical exposure might decrease one metabolite reported to be positively related to health outcomes in a previous study. (D) Positive association between maternal exposure to exogenous chemicals and outcome from literature; negative associations between maternal metabolite and outcome from literature, between maternal exposure to exogenous chemicals and metabolite identified in our study. In this scenario, a previous study reported that exogenous chemical exposure is positively related to health outcomes, and our study found that exogenous chemical exposure might decrease one metabolite reported to be negatively related to health outcomes in a previous study.

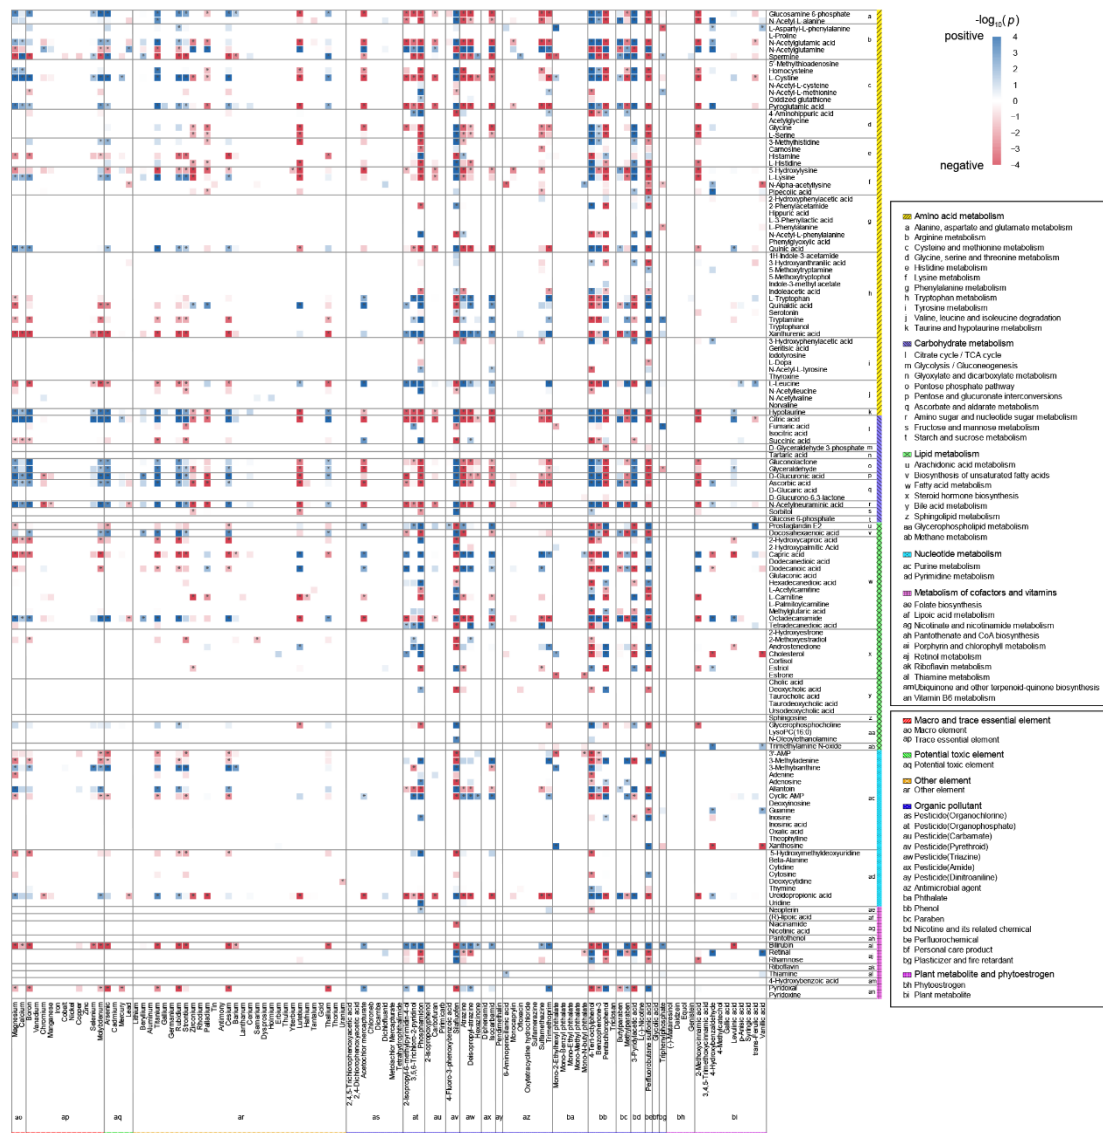

**Figure S3.** Heatmap of Bonferroni-14,734 corrected  $p$  value regarding associations between exposome and metabolome in urine from pregnant women in Jiangsu province from April 2013 to July 2016. When the association was in the positive direction, the blue scale was used for visualizing  $-\log_{10}(p)$  value. When the association was in the negative direction, the red scale was used for visualizing  $-\log_{10}(p)$  value. The association was adjusted by maternal age, BMI before pregnancy, parity, and education using polytomous logistic regression with Bonferroni correction. “\*” indicates Bonferroni corrected  $p$  value  $< 0.05$ . The sample size for the association analysis between organic exposome and metabolome was 1,024; the sample size for the association analysis between inorganic exposome and metabolome was 963. The data underlying this figure can be found in **Excel Table S2**.

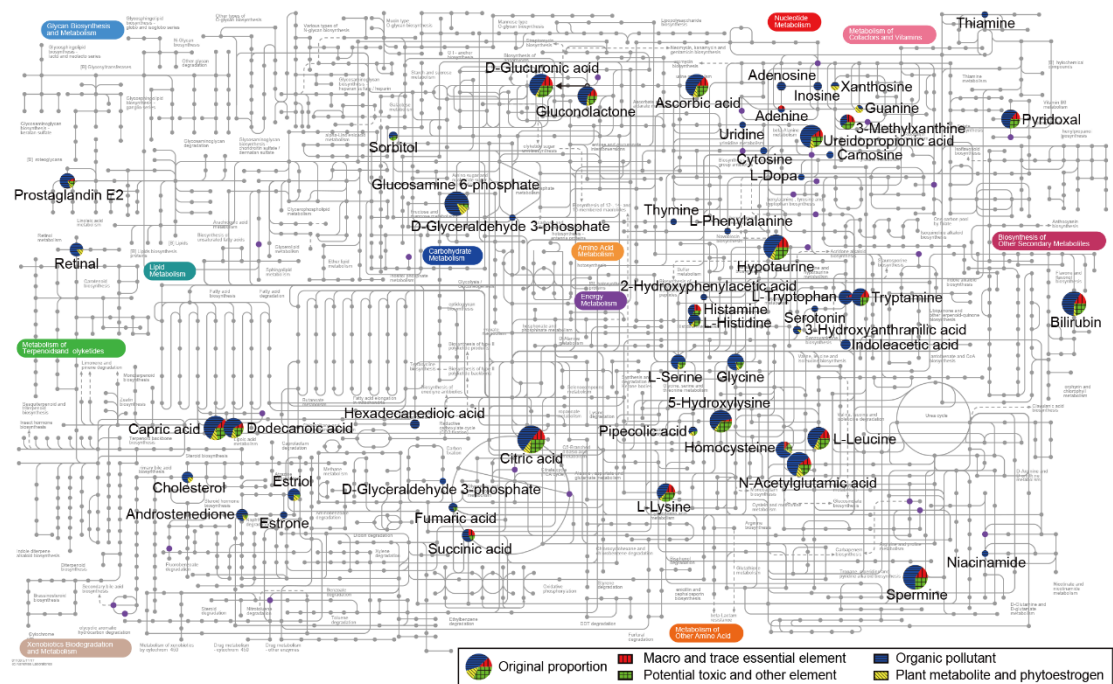

**Figure S4.** Network of environmentally determined urinary metabolites of pregnant women in Jiangsu province from April 2013 to July 2016 in the KEGG general metabolic pathway map. The figure was built by ipath (<https://pathways.embl.de/>). The sample size for the environmentally determined urinary metabolites according to the organic exposome was 1,024; the sample size for the environmentally determined urinary metabolites according to the inorganic exposome was 963. The pie chart named “original proportion” shows the original constituent ratios of numbers of profiled chemicals in the exposome classified into macro and trace essential element, potential toxic and other element, organic pollutant, and plant metabolite and phytoestrogen. The pie charts in the pathway were built based on constituent ratios of numbers of chemicals in the exposome that were significantly associated with this metabolite classified into macro and trace essential element, potential toxic and other element, organic pollutant, and plant metabolite and phytoestrogen, and the size of pie charts reflects by the number of chemicals in the exposome that were significantly associated with this metabolite. Other profiled metabolites without significant association with any exposome chemical in our study were colored purple in the pathway map. Metabolites not included in the general metabolic pathway map are not shown. The original general metabolic pathway map is available at <https://pathways.embl.de/ipath3.cgi>. KEGG, Kyoto Encyclopedia of Genes and Genomes. The data underlying this figure can be found in **Figure S3** and **Excel Table S2**.

## Reference:

- Bell ML, Belanger K, Ebisu K, Gent JF, Leaderer BP. 2012. Relationship between birth weight and exposure to airborne fine particulate potassium and titanium during gestation. *Environmental research* 117:83-89.
- Bernard BK, Hoberman AM, Brown WR, Ranpuria AK, Christian MS. 2002. Oral (gavage) two-generation (one litter per generation) reproduction study of pentachlorophenol (penta) in rats. *International journal of toxicology* 21:301-318.
- Buckley JP, Herring AH, Wolff MS, Calafat AM, Engel SM. 2016. Prenatal exposure to environmental phenols and childhood fat mass in the mount sinai children's environmental health study. *Environment international* 91:350-356.
- Carlson SE, Gajewski BJ, Alhayek S, Colombo J, Kerling EH, Gustafson KM. 2018. Dose-response relationship between docosahexaenoic acid (dha) intake and lower rates of early preterm birth, low birth weight and very low birth weight. *Prostaglandins Leukot Essent Fatty Acids* 138:1-5.
- Chiu YH, Bellavia A, James-Todd T, Correia KF, Valeri L, Messerlian C, et al. 2018. Evaluating effects of prenatal exposure to phthalate mixtures on birth weight: A comparison of three statistical approaches. *Environment international* 113:231-239.
- Davis LK, Murr AS, Best DS, Fraites MJ, Zorrilla LM, Narotsky MG, et al. 2011. The effects of prenatal exposure to atrazine on pubertal and postnatal reproductive indices in the female rat. *Reproductive toxicology (Elmsford, NY)* 32:43-51.
- Esteller-Vico A, Ball BA, Troedsson MHT, Squires EL. 2017. Endocrine changes, fetal growth, and uterine artery hemodynamics after chronic estrogen suppression during the last trimester of equine pregnancy. *Biol Reprod* 96:414-423.
- Guo J, Wu C, Lv S, Lu D, Feng C, Qi X, et al. 2016. Associations of prenatal exposure to five chlorophenols with adverse birth outcomes. *Environ Pollut* 214:478-484.
- Guzel AI, Cinar M, Erkilinc S, Aksoy RT, Yumusak OH, Celik F, et al. 2016. Association between adverse perinatal outcomes and amino acid levels measured with nutrient questionnaire in adolescent pregnancies. *Journal of the Chinese Medical Association : JCMA* 79:335-339.
- Hibbeln JR, Davis JM, Steer C, Emmett P, Rogers I, Williams C, et al. 2007. Maternal seafood consumption in pregnancy and neurodevelopmental outcomes in childhood (alspac study): An observational cohort study. *Lancet* 369:578-585.
- Horan MK, McGowan CA, Gibney ER, Byrne J, Donnelly JM, McAuliffe FM. 2016. Maternal nutrition and glycaemic index during pregnancy impacts on offspring adiposity at 6 months of age--analysis from the rolo randomised controlled trial. *Nutrients* 8.
- Jang W, Kim H, Lee BE, Chang N. 2018. Maternal fruit and vegetable or vitamin c consumption during pregnancy is associated with fetal growth and infant growth up to 6 months: Results from the korean mothers and children's environmental health (moceh) cohort study. *Nutr J* 17:105.
- Jayashankar S, Glover CN, Folven KI, Brattelid T, Hogstrand C, Lundebye AK. 2012. Cerebral gene expression and neurobehavioural responses in mice pups exposed to methylmercury and docosahexaenoic acid through the maternal diet. *Environmental toxicology and pharmacology* 33:26-38.
- Laine JE, Bailey KA, Rubio-Andrade M, Olshan AF, Smeester L, Drobna Z, et al. 2015. Maternal arsenic exposure, arsenic methylation efficiency, and birth outcomes in the biomarkers of exposure to arsenic (bear) pregnancy cohort in mexico. *Environmental health perspectives* 123:186-192.
- Liu C, Luo D, Wang Q, Ma Y, Ping L, Wu T, et al. 2020. Serum homocysteine and folate concentrations

- in early pregnancy and subsequent events of adverse pregnancy outcome: The sichuan homocysteine study. *BMC Pregnancy Childbirth* 20:176.
- Lv S, Wu C, Lu D, Qi X, Xu H, Guo J, et al. 2016. Birth outcome measures and prenatal exposure to 4-tert-octylphenol. *Environ Pollut* 212:65-70.
- Maitre L, Fthenou E, Athersuch T, Coen M, Toledano MB, Holmes E, et al. 2014. Urinary metabolic profiles in early pregnancy are associated with preterm birth and fetal growth restriction in the rhea mother-child cohort study. *BMC Med* 12:110.
- Mitrovic-Jovanovic A, Dragojevic-Dikic S, Zamurovic M, Nikolic B, Gojnic M, Rakic S, et al. 2012. Comparison of electrolytic status (na<sup>+</sup>, k<sup>+</sup>, ca<sup>2+</sup>, mg<sup>2+</sup>) in preterm and term deliveries. *Clin Exp Obstet Gynecol* 39:479-482.
- Mitsui T, Araki A, Goudarzi H, Miyashita C, Ito S, Sasaki S, et al. 2018. Relationship between adrenal steroid hormones in cord blood and birth weight: The sapporo cohort, hokkaido study on environment and children's health. *Am J Hum Biol* 30:e23127.
- Moghissi KS, Churchill JA, Kurrie D. 1975. Relationship of maternal amino acids and proteins to fetal growth and mental development. *Am J Obstet Gynecol* 123:398-410.
- Nam SM, Seo JS, Nahm SS, Chang BJ. 2019. Effects of ascorbic acid on osteopontin expression and axonal myelination in the developing cerebellum of lead-exposed rat pups. *International journal of environmental research and public health* 16.
- Olsen SF, Osterdal ML, Salvig JD, Mortensen LM, Rytter D, Secher NJ, et al. 2008. Fish oil intake compared with olive oil intake in late pregnancy and asthma in the offspring: 16 y of registry-based follow-up from a randomized controlled trial. *Am J Clin Nutr* 88:167-175.
- Rastegar-Moghaddam SH, Mohammadipour A, Hosseini M, Bargi R, Ebrahimzadeh-Bideskan A. 2019. Maternal exposure to atrazine induces the hippocampal cell apoptosis in mice offspring and impairs their learning and spatial memory. *Toxin Reviews* 38:298-306.
- Rogers JM, Ellis-Hutchings RG, Grey BE, Zucker RM, Norwood J, Jr., Grace CE, et al. 2014. Elevated blood pressure in offspring of rats exposed to diverse chemicals during pregnancy. *Toxicol Sci* 137:436-446.
- Rowe AM, Brundage KM, Schafer R, Barnett JB. 2006. Immunomodulatory effects of maternal atrazine exposure on male balb/c mice. *Toxicol Appl Pharmacol* 214:69-77.
- Sirasanagandla SR, Rooben RK, Rajkumar, Narayanan SN, Jetti R. 2014. Ascorbic acid ameliorates nicotine exposure induced impaired spatial memory performances in rats. *The West Indian medical journal* 63:318-324.
- Stayner LT, Almberg K, Jones R, Graber J, Pedersen M, Turyk M. 2017. Atrazine and nitrate in drinking water and the risk of preterm delivery and low birth weight in four midwestern states. *Environmental research* 152:294-303.
- Tarannum F, Faizuddin M, Madaiah H. 2011. Gingival crevicular fluid prostaglandin e2 level as a predictor of preterm low birth weight: A pilot investigation. *Journal of oral science* 53:293-300.
- Virk J, Liew Z, Olsen J, Nohr EA, Catov JM, Ritz B. 2018. Pre-conceptual and prenatal supplementary folic acid and multivitamin intake, behavioral problems, and hyperkinetic disorders: A study based on the danish national birth cohort (dnbc). *Nutr Neurosci* 21:352-360.
- Wang J, Yin N, Deng Y, Wei Y, Huang Y, Pu X, et al. 2016. Ascorbic acid protects against hypertension through downregulation of ace1 gene expression mediated by histone deacetylation in prenatal inflammation-induced offspring. *Scientific reports* 6:39469.
- Wang J, Wu W, Li H, Cao L, Wu M, Liu J, et al. 2019. Relation of prenatal low-level mercury exposure

with early child neurobehavioral development and exploration of the effects of sex and dha on it. *Environment international* 126:14-23.

West CE, Dunstan J, McCarthy S, Metcalfe J, D'Vaz N, Meldrum S, et al. 2012. Associations between maternal antioxidant intakes in pregnancy and infant allergic outcomes. *Nutrients* 4:1747-1758.

Yang J, Xie RH, Krewski D, Wang YJ, Walker M, Wen SW. 2011. Exposure to trimethoprim/sulfamethoxazole but not other fda category c and d anti-infectives is associated with increased risks of preterm birth and low birth weight. *Int J Infect Dis* 15:e336-341.
